# Supplementary material for: Functionalized Sc2N as Ohmic-contact electrodes for monolayer PtSe2: an ab initio study
Source: Royal Society of Chemistry journal article supplement (doi:10.1039/d4cp04328f), 2025-01-01
Supplement: d4cp04328f1.pdf [file d4cp04328f1.pdf]

## Supporting Information

### Functionalized Sc<sub>2</sub>N as Ohmic contacted electrodes for Monolayer

#### PtSe<sub>2</sub>: An *ab initio* Study

Hong Li<sup>1,\*</sup>, Jiahui Li<sup>1</sup>, Chaoyang Fan<sup>1</sup>, Fengbin Liu<sup>1</sup>, Shuai Sun<sup>1</sup>, and Jing Lu<sup>2,3,4\*</sup>

<sup>1</sup> College of Mechanical and Material Engineering, North China University of Technology,  
Beijing 100144, P. R. China

<sup>2</sup> State Key Laboratory of Mesoscopic Physics and Department of Physics, Peking University,  
Beijing 100871, P. R. China

<sup>3</sup> Collaborative Innovation Center of Quantum Matter, Beijing 100871, P. R. China

<sup>4</sup> Peking University Yangtze Delta Institute of Optoelectronics, Nantong 226000, P. R. China

\*Corresponding author: [jinglu@pku.edu.cn](mailto:jinglu@pku.edu.cn); [lihong@ncut.edu.cn](mailto:lihong@ncut.edu.cn)

**Table S1.** The lattice mismatch, interlayer distance ( $d$ ), binding energy ( $E_b$ ), band gap ( $E_g$ ), vertical Schottky barriers ( $\Phi_n^\perp/\Phi_p^\perp$ ), and lateral Schottky barriers ( $\Phi_n^\parallel/\Phi_p^\parallel$ ) of the PtSe<sub>2</sub>/Sc<sub>2</sub>N and PtSe<sub>2</sub>/Sc<sub>2</sub>NX<sub>2</sub> (X = F, O, and OH) vertical heterojunctions with supercells of  $(\sqrt{3}\times\sqrt{3})/(2\times 2)$ .

|                                                       | mismatch | $d$<br>(Å) | $E_b$<br>(meV/Å <sup>2</sup> ) | $E_g$<br>(eV) | $\Phi_n^\perp/\Phi_p^\perp$<br>(eV) | $\Phi_n^\parallel/\Phi_p^\parallel$<br>(eV) |
|-------------------------------------------------------|----------|------------|--------------------------------|---------------|-------------------------------------|---------------------------------------------|
| PtSe <sub>2</sub> /Sc <sub>2</sub> N                  | 1.38%    | 3.02       | -86.76                         | 1.12          | -0.32/1.44                          | -0.32/1.31                                  |
| PtSe <sub>2</sub> /Sc <sub>2</sub> NF <sub>2</sub>    | 0.97%    | 2.87       | -23.51                         | 1.36          | -0.02/1.38                          | -0.14/1.38                                  |
| PtSe <sub>2</sub> /Sc <sub>2</sub> NO <sub>2</sub>    | 0.32%    | 2.55       | -49.38                         | 1.55          | 1.32/0.23                           | 1.43/-0.03                                  |
| PtSe <sub>2</sub> /Sc <sub>2</sub> N(OH) <sub>2</sub> | 0.21%    | 2.03       | -62.80                         | 1.32          | -0.16/1.48                          | -0.16/1.48                                  |

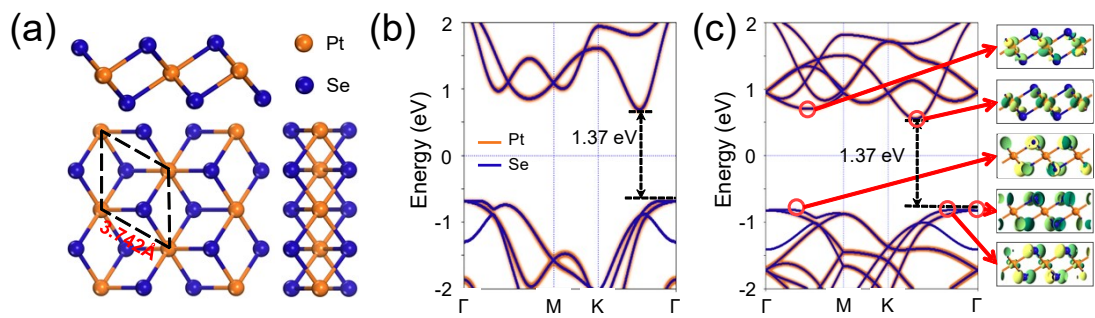

**Figure S1.** (a) The geometric structure and (b) projected band structure of ML PtSe<sub>2</sub>. (c) The projected band structure of ML PtSe<sub>2</sub> with  $\sqrt{3} \times \sqrt{3}$  supercell and Bloch states at specific k point.

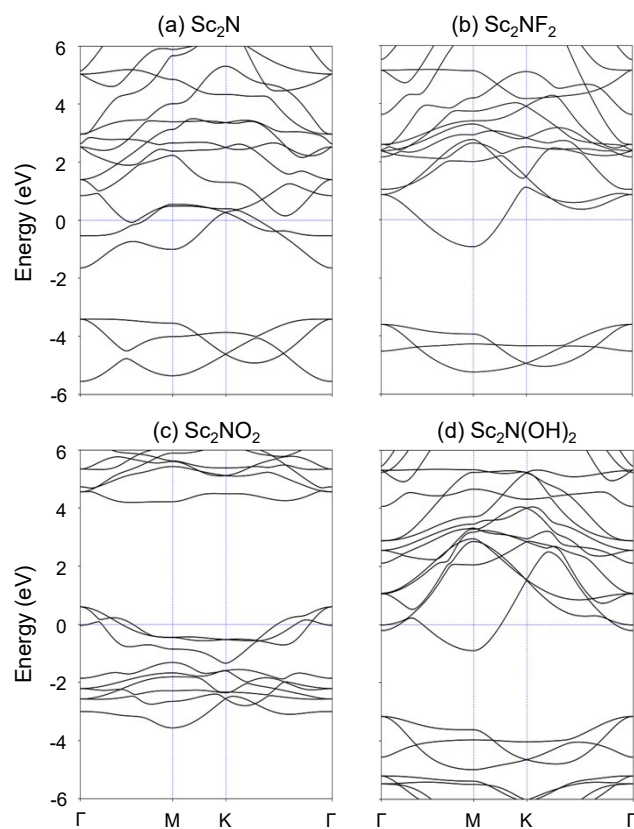

**Figure S2.** The band structures of ML Sc<sub>2</sub>N and functionalized Sc<sub>2</sub>NX<sub>2</sub> (X = F, O, and OH).

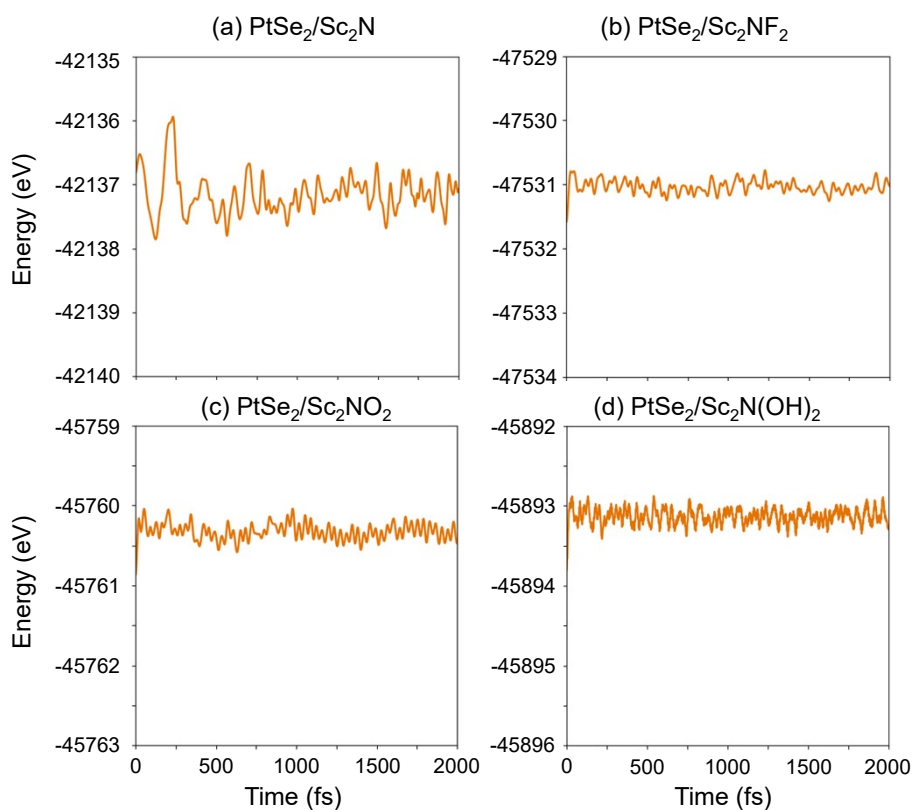

**Figure S3.** The *ab initio* molecular dynamics (AIMD) simulations of the  $\text{PtSe}_2/\text{Sc}_2\text{NX}_2$  ( $X = \text{null, F, O, and OH}$ ) vertical heterojunctions at 300 K for 2000 fs.

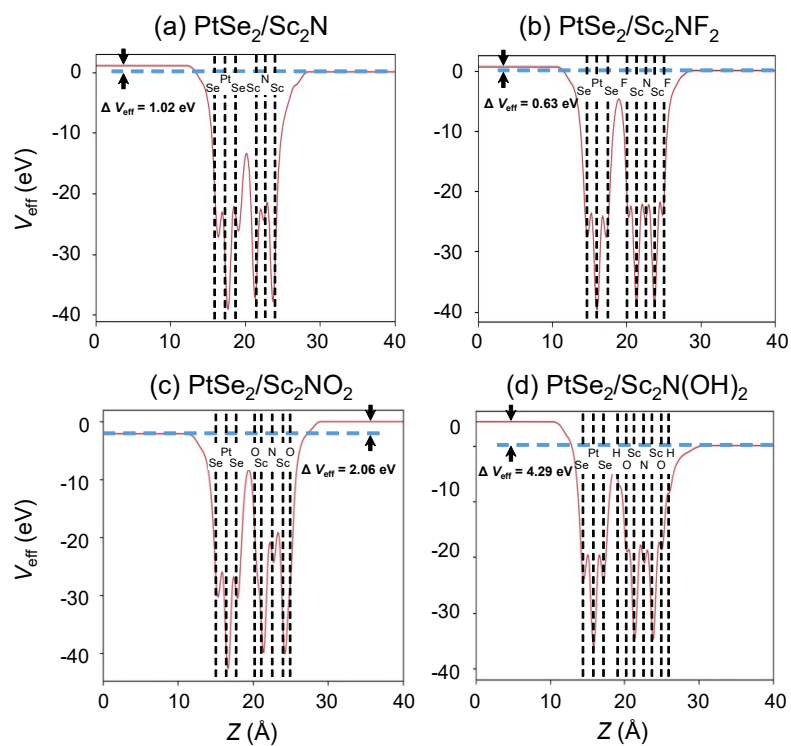

**Figure S4.** The electrostatic potentials of the  $\text{PtSe}_2/\text{Sc}_2\text{NX}_2$  ( $X = \text{null, F, O, and OH}$ ) vertical heterojunctions.

(a) stacking-Se

(b) stacking-Pt

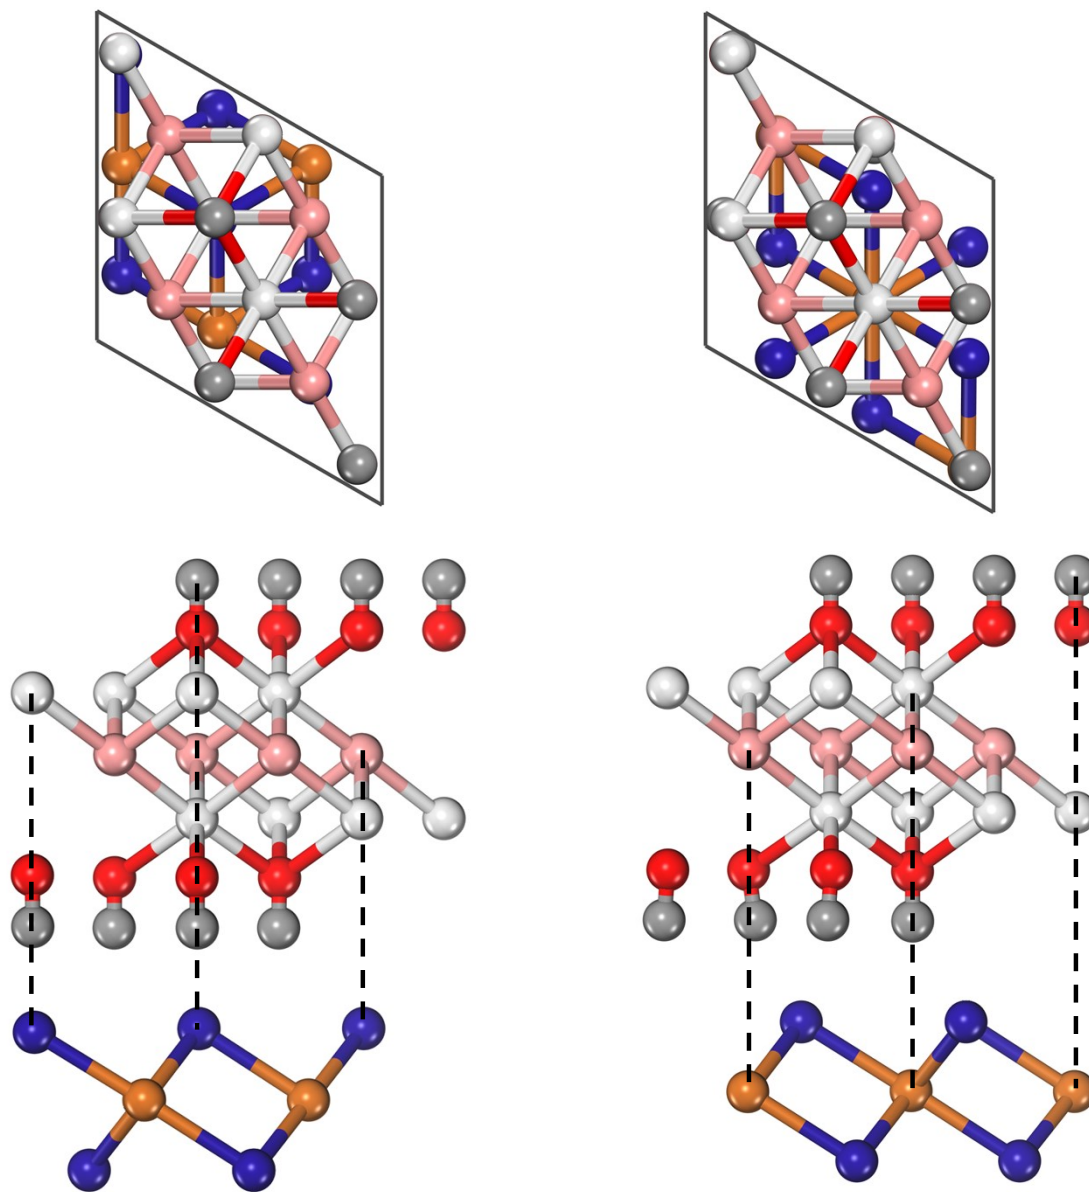

**Figure S5.** Side and top views of two more considered stacking patterns of the PtSe<sub>2</sub>/Sc<sub>2</sub>NX<sub>2</sub> (X = null, F, O, and OH) vertical heterojunctions with Sc<sub>2</sub>N(OH)<sub>2</sub> metal as representative.

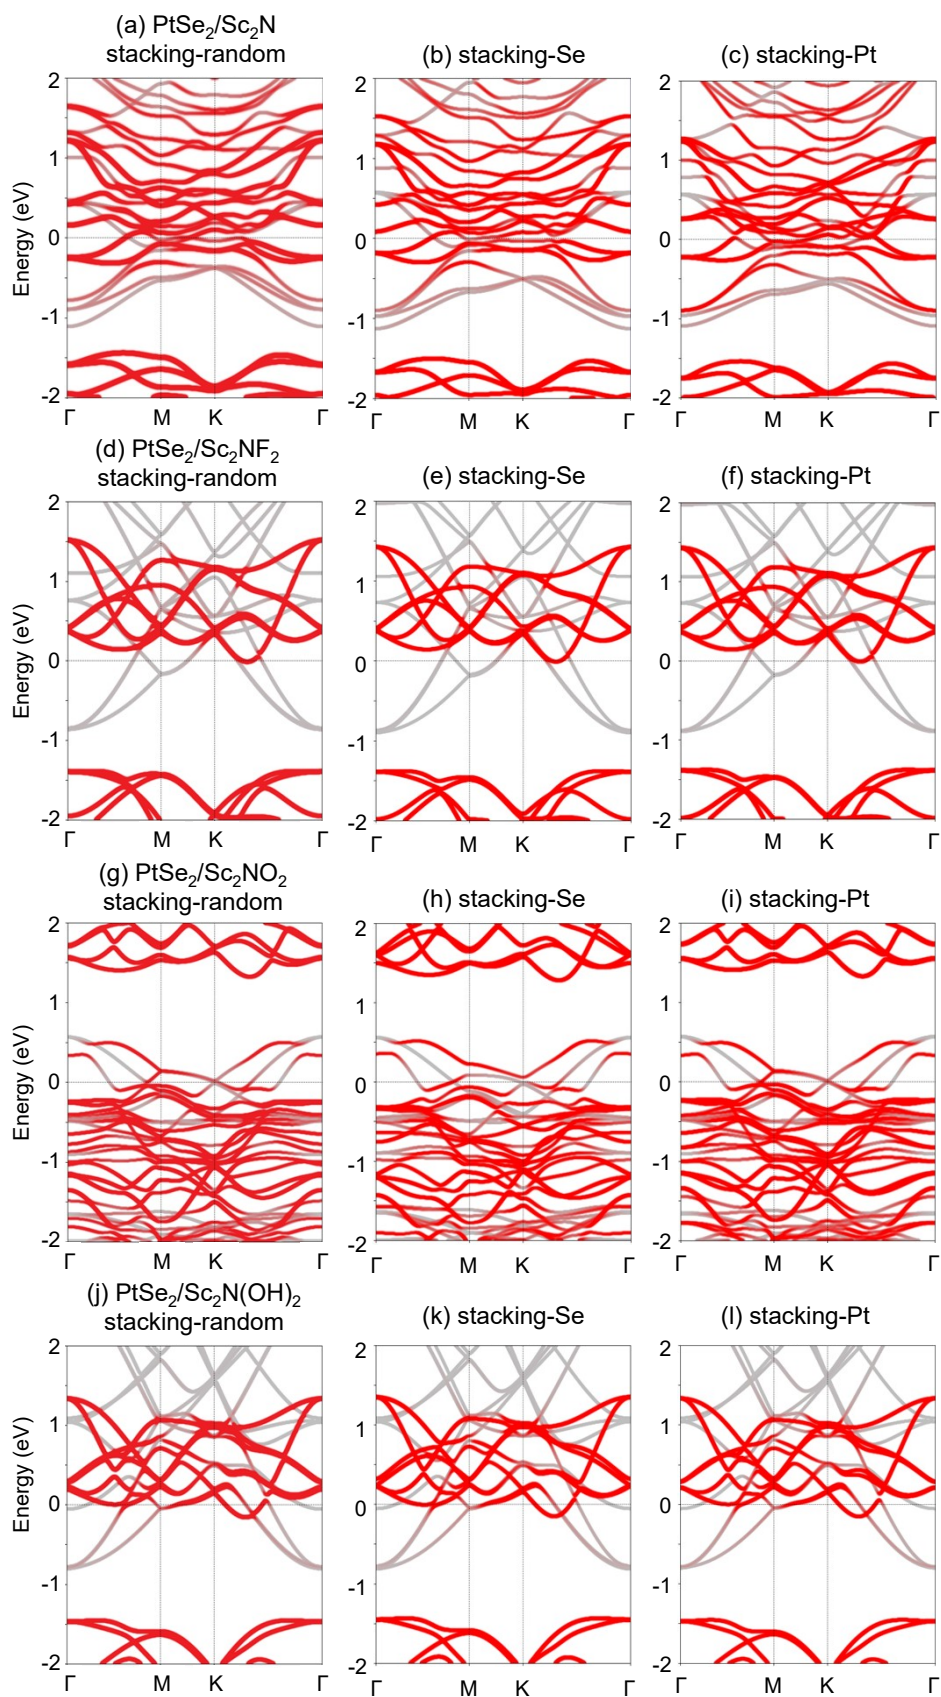

**Figure S6.** Comparison of projected band structures of the  $\text{PtSe}_2/\text{Sc}_2\text{NX}_2$  ( $X = \text{null, F, O, and OH}$ ) vertical heterojunctions with stacking patterns.



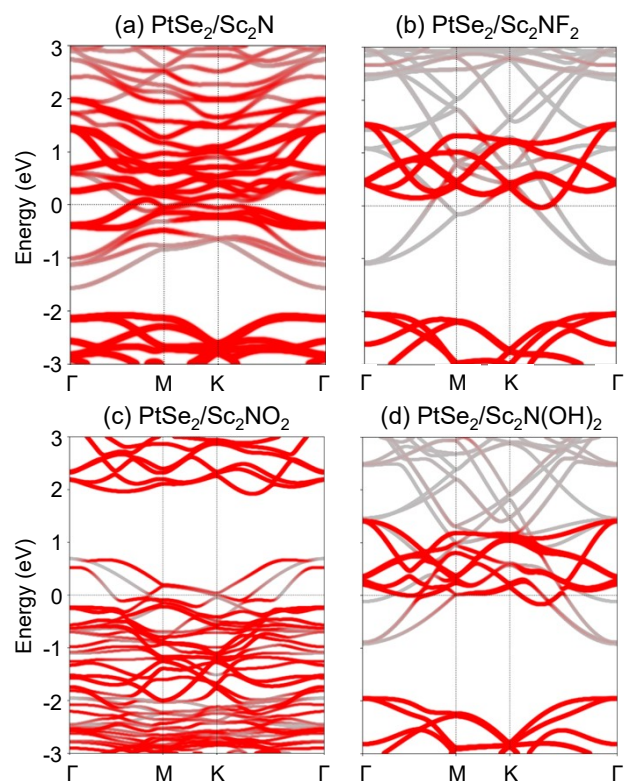

**Figure S7.** The projected band structures of the PtSe<sub>2</sub>/Sc<sub>2</sub>NX<sub>2</sub> (X = null, F, O, and OH) vertical heterojunctions at HSE06 level.
